# Supplementary material for: A general hierarchical flower-shaped cobalt oxide spinel template: facile method, morphology control, and enhanced saturation magnetization
Source: Royal Society of Chemistry journal article supplement (doi:10.1039/d0tc03762a), 2020-01-01
Supplement: d0tc03762a3.xlsx [file d0tc03762a3.xlsx]

## Sheet: Synthesis strategy
Citations	Precursors (mmol)					ODE (mL)	BE (mL)	DDA (mmol)	DDD (mmol)	TDD (mmol)	OA (mL)	OAm (mL)	TOP (mL)	Other notes
	Co	Fe	Mn	Ni	Other
Figure 1 A1	1					30			15		4	1	1	reaction time is 100 min
Figure 1 A2	1.2					30			15		4	1	1
Figure 1 A3	1					27.5				10	2.5	3.5		heating rate is 4.6 °C/min
Figure 1 A4	0.5					15			7.5		2	0.5	0.5
Figure 1 A5	1					27.5				10	2.5	3.5
Figure 1 A6	1						20		20		4	1	1
Figure 1 A7	1					30			12		4	1	1
Figure 1 A8	1					30			15		4	1	1
Figure 1 A9	1					30			20		4	1	1
Figure 1 A10	1					30		20			4	1
Figure 1 A11	1					20		20			1	1	1
Figure 1 A12	1					20		20			1	1	2
Figure 1 B1		1				20		20			1	1	1
Figure 1 B2	1	0.8				20		20			4	1	1
Figure 1 B3	1	0.5				20		20			4	1	1	reaction time is 80 min
Figure 1 B4	1	0.5				20		20			5	1	1
Figure 1 B5	1	0.5				20		20			4	1	1
Figure 1 B6	1	0.5				20		20			3	1	1
Figure 1 B7	1	0.5				20		50			4	1	1
Figure 1 B8	1	0.5				20		20			1	1	1
Figure 1 B9	1	0.5				20		20			2	1	1
Figure 1 B10	1	0.5				20		20			4	1
Figure 1 B11		0.5				10		20			1	1	1	after 80 min, 1 mmol Co and 10 mL ODE was injected into the Fe solution, react 10 min
Figure 1 B12	0.9	0.1				30			15		4	1	1
Figure 1 C1			1			18		20			1	1	1
Figure 1 C2	1		0.3			20		20			1	1	1
Figure 1 C3	1		0.3			20		20			1	1	2
Figure 1 C4	1		0.5			30			15		4	1	1
Figure 1 C5	1		0.3			20		20			4	1	1
Figure 1 C6	1		0.1			20		20			1	1	1
Figure 1 D1				1		18		20			2.5	1	1
Figure 1 D2	1			0.05		20		20			1	1	1
Figure 1 D3	1			0.05		20		20			1	1	1	reaction time is 70 min
Figure 1 D4	1			0.3		20		20			1	1	1
Figure 1 D5	1			0.1		20		20			1	1	1
Figure 1 D6	1			0.05		20		50			1	1	1
Figure 5 FNC (a)	1	0.3		0.1		20		20			1	1	1
Figure 5 FNC (b)	1	0.5		0.05		20		20			1	1	1
Figure 6 a	1				Cu 0.5	20		20			1	1	1
Figure 6 b	1				Ag 0.2	20		20			1	1	1
Figure 6 c	1				Ti 0.3	20		20			1	1	1
Figure 6 d	1				Li 0.5	20		20			1	1	1
Figure 6 e	1				K 0.5	20		20			1	1	1
Figure 6 f	1				Zn 0.5	20		20			1	1	1
Figure 6 g	1				Pd 0.1	20		20			1	1	1
Figure 6 h	1				Mo 0.3	20		20			1	1	1
Figure 6 i	1				Gd 0.5	20		20			1	1	1
Figure 6 j	1				Pt 0.1	20		20			1	1	1
Figure 6 k	1				Ga 0.5	20		20			1	1	1
Figure 6 l	1				Al 0.5	20		20			1	1	1
Figure 6 m	1				Cr 0.5	20		20			1	1	1
Figure 6 n	1				Ferrocene 0.5	20		20			1	1	1
Figure 6 o	1				Ag 0.2 Cu 0.2	20		20			1	1	1

## Sheet: M atomic percentage
Citations	M element	M atomic percentage/ % ratio of M to Co
Figure 6 a	Cu	28.22
Figure 6 b	Ag	17.99
Figure 6 c	Ti	47.76
Figure 6 d	Li	17.07
Figure 6 e	K	0
Figure 6 f	Zn	4.25
Figure 6 g	Pd	1.14
Figure 6 h	Mo	0.37
Figure 6 i	Gd	23.22
Figure 6 j	Pt	0.46
Figure 6 k	Ga	1.1
Figure 6 l	Al	18.56
Figure 6 m	Cr	0.27
Figure 6 n	Ferrocene	10.75
Figure 6 o	Ag/Cu	6.85/21.09
